# Supplementary material for: Significant lead-induced tricuspid regurgitation is associated with poor prognosis at long-term follow-up
Source: HighWire-hosted journal article supplement (doi:10.1136/heartjnl-2013-304673), 2014-01-21
Supplement: heartjnl-2013-304673supp.pdf [file heartjnl-2013-304673supp.pdf]

Supplemental file for Online:

Shift table shows the number of patients and change in TR grade at follow-up echocardiography stratified by the TR grade at baseline.

| The change                 |              | From: | Baseline echocardiography |            |             |              |
|----------------------------|--------------|-------|---------------------------|------------|-------------|--------------|
|                            |              |       | TR grade 0                | TR grade I | TR grade II | TR grade III |
| Follow-up echocardiography | TR grade 0   | 33    | 3                         |            |             |              |
|                            | TR grade I   | 24    | 68                        |            |             |              |
|                            | TR grade II  | 22    | 53                        | 16         | 1           |              |
|                            | TR grade III | 1     | 6                         | 4          | 3           |              |
|                            | TR grade IV  | 1     | 1                         | 2          | 1           |              |

Green= less TR; Grey= unchanged TR; Red=more TR.
